# Supplementary material
Source: publisher figshare collection journal article supplement (https://frontiersin.figshare.com/ndownloader/files/28218120)
Supplement: Supplementary file [file 28218120]

Supplementary Figure 1

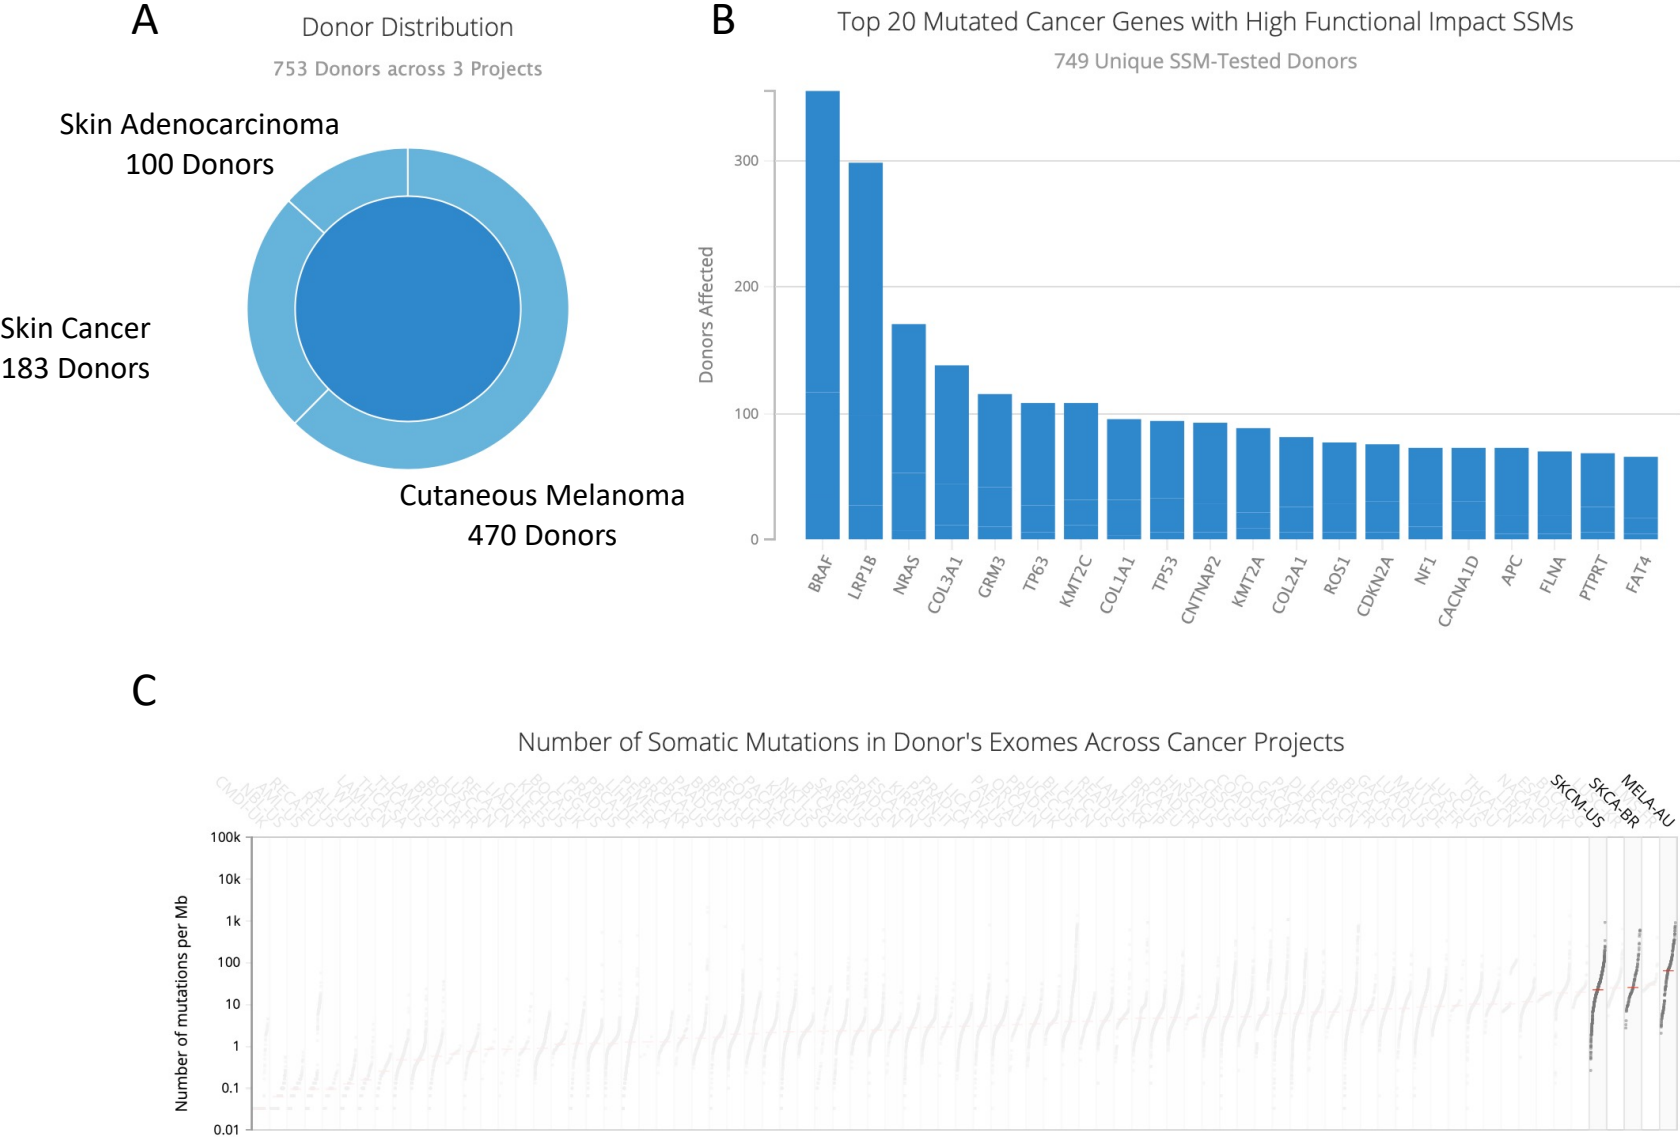

**Suppl. Fig. 1.** Example of ICGC dashboard. Data breakdown of the two skin cancer and one melanoma projects retrieved from ICGC website (<https://icgc.org>), as of October 2020.

## Supplementary Figure 2

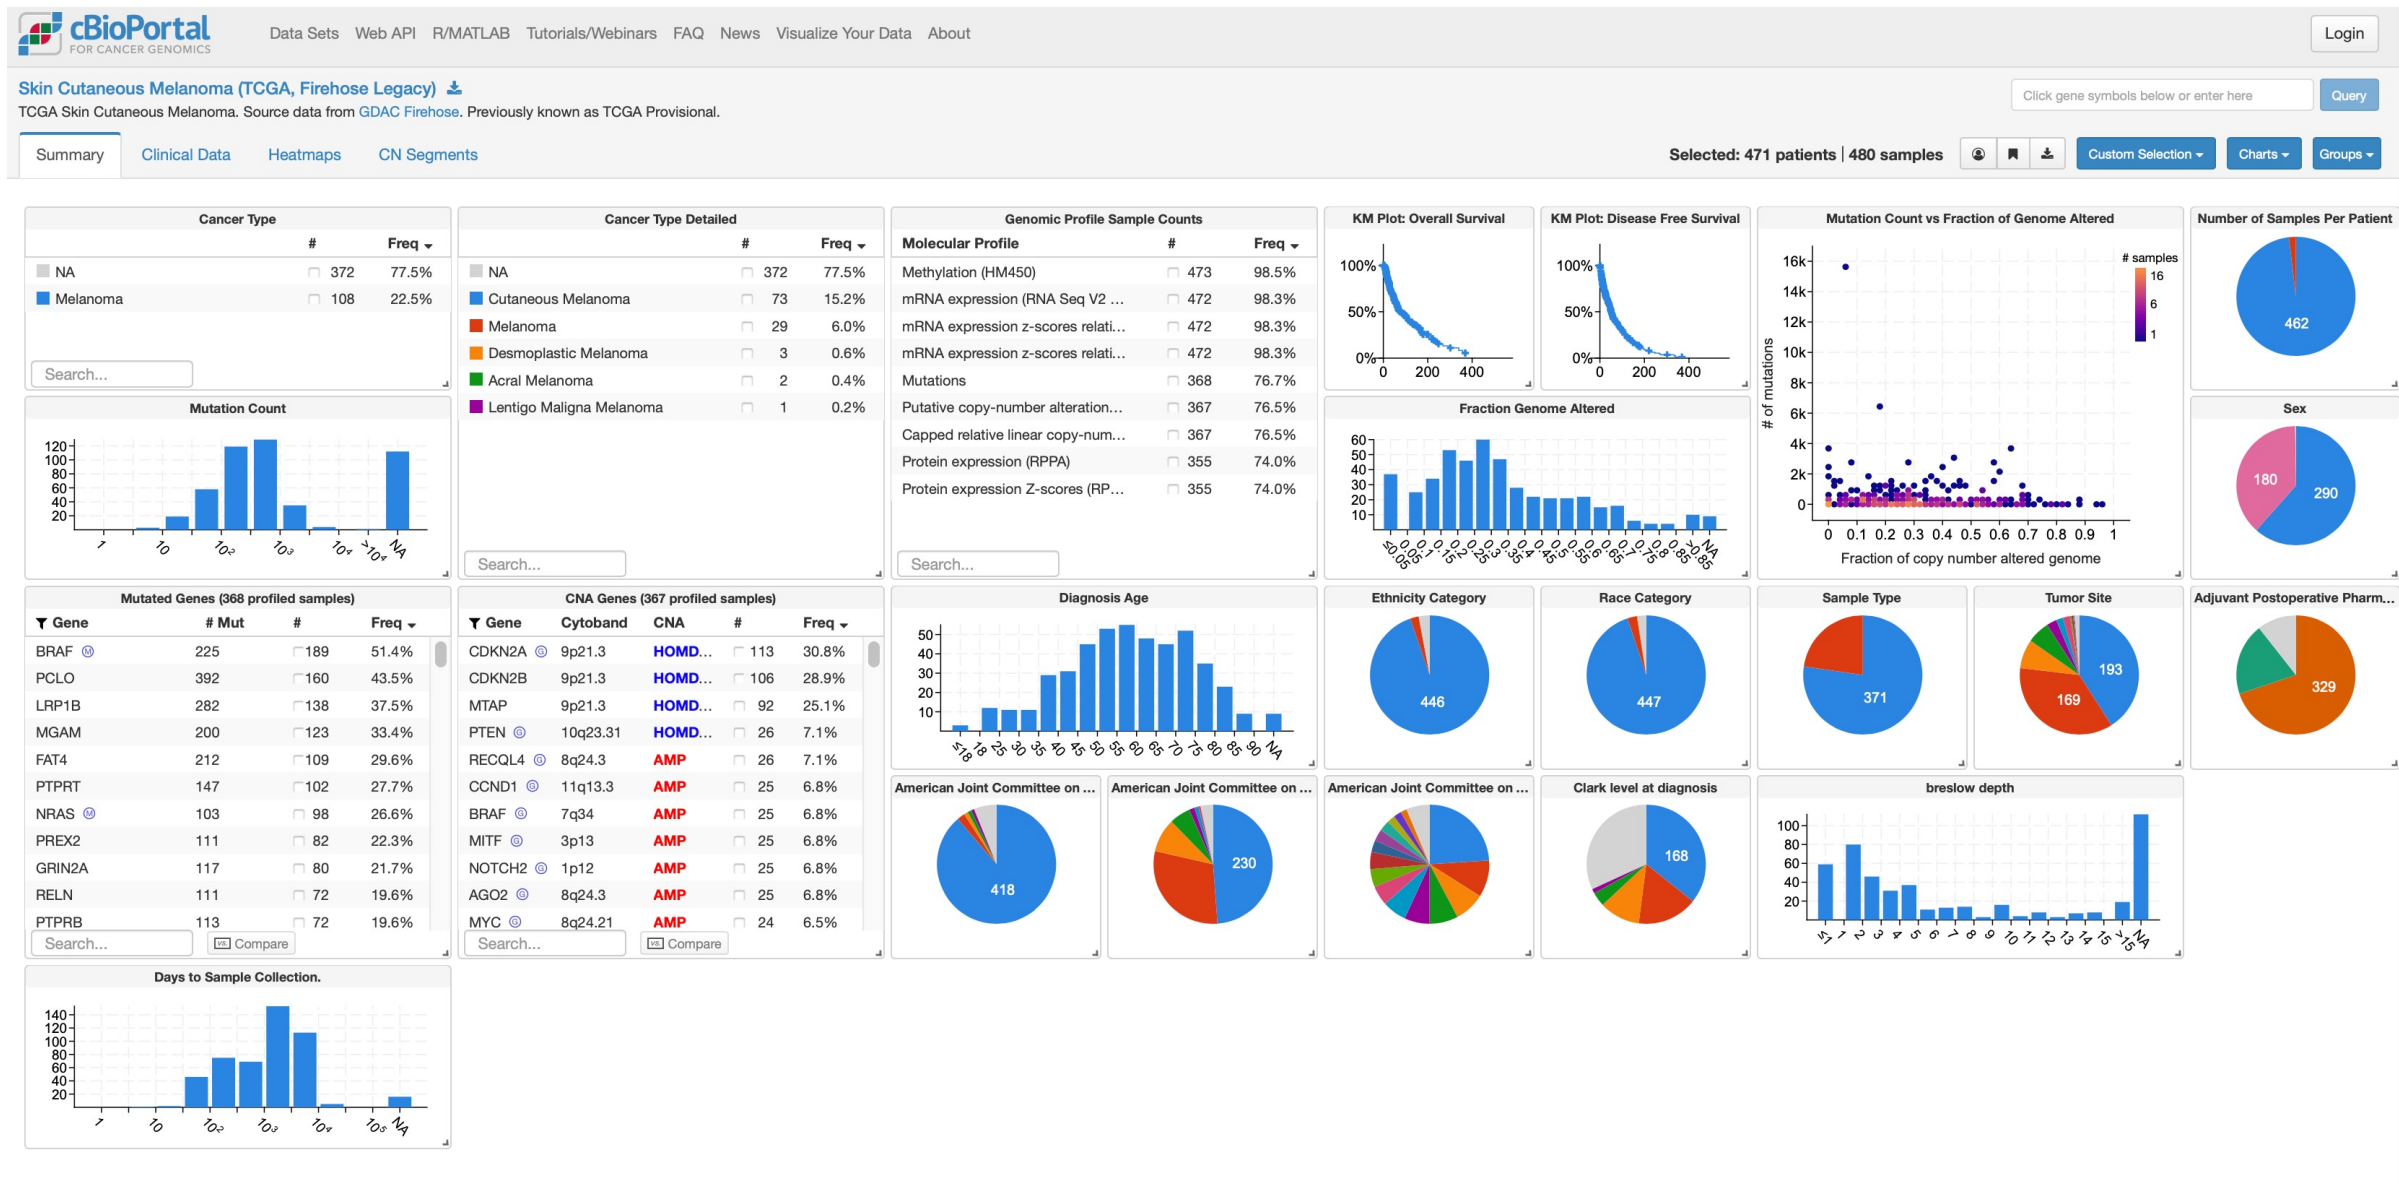

**Suppl. Fig. 2.** Interface of cBioPortal for 471 patients of skin cutaneous melanoma, as of Oct 2020. Different samples features are displayed by the graphs.
